# Supplementary material for: Influence of cysteine and bovine serum albumin on silver nanoparticle stability, dissolution, and toxicity to Phanerochaete chrysosporium
Source: Royal Society of Chemistry journal article supplement (doi:10.1039/c6ra23675h), 2016-01-01
Supplement: c6ra23675h1.pdf [file c6ra23675h1.pdf]

**Influence of Cysteine and Bovine Serum Albumin on Silver Nanoparticle Stability, Dissolution, and Toxicity to *Phanerochaete chrysosporium***

Feng Yi,<sup>a,b</sup> Guiqiu Chen,<sup>\*,a,b</sup> Guangming Zeng,<sup>\*,a,b</sup> Zhi Guo,<sup>a,b</sup> Weiwei Liu,<sup>a,b</sup> Zhenzhen Huang,<sup>a,b</sup> Liang Hu,<sup>a,b</sup> kai He<sup>a,b</sup>

<sup>a</sup>College of Environmental Science and Engineering, Hunan University, Changsha 410082, P.R. China

<sup>b</sup>Key Laboratory of Environmental Biology and Pollution Control (Hunan University), Ministry of Education, Changsha 410082, P.R. China

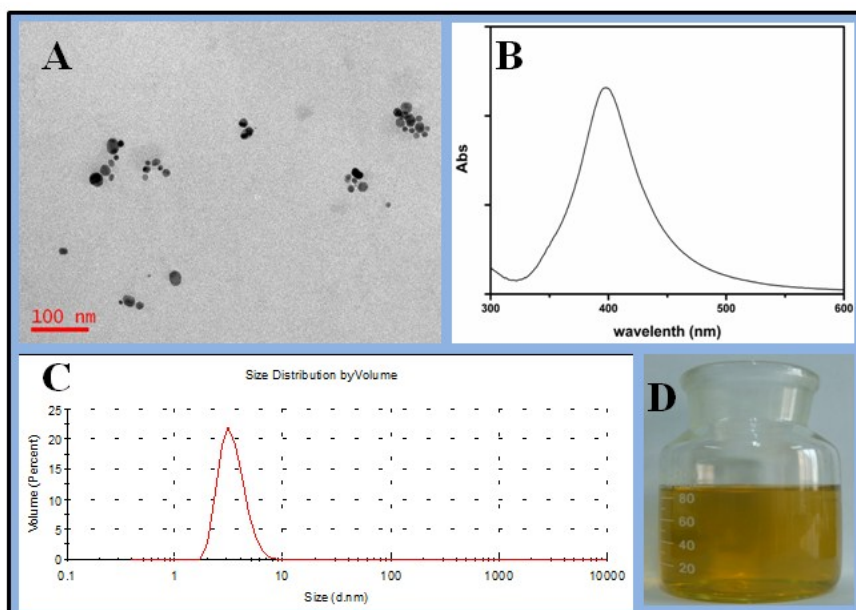

Figure S1. (A) Transmission electron microscopy (TEM) micrographs of citrate-stabilized AgNPs. (B) UV-vis spectrum of citrate-stabilized AgNPs. (C) Size distribution by volume of citrate-stabilized AgNPs. (D) Colloidal suspension of stock citrate-stabilized AgNPs.

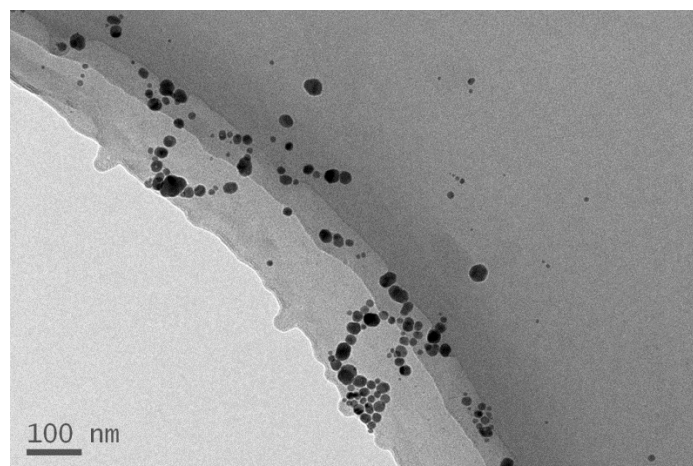

Figure S2. Transmission electron microscopy (TEM) micrographs of AgNPs after addition of CYS.

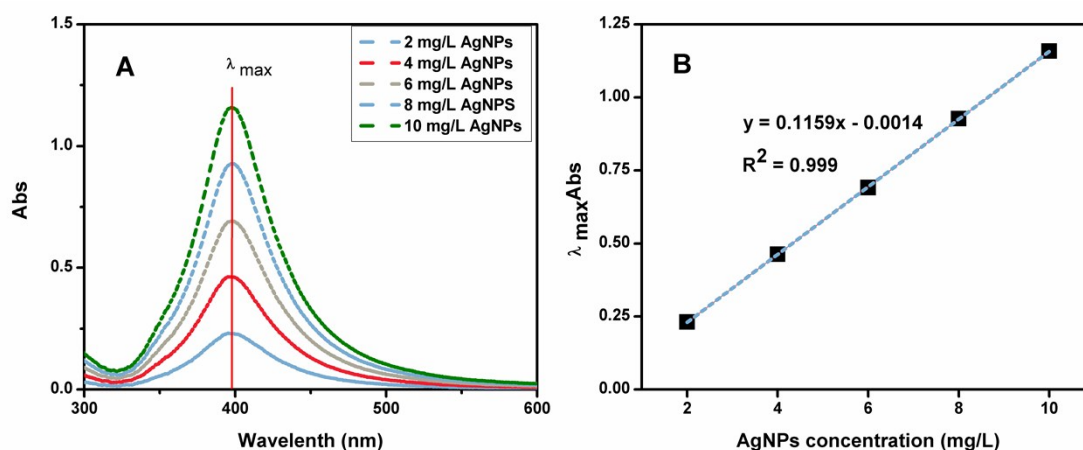

Figure S3. (A) UV-vis absorption spectra of various concentrations of citrate-stabilized AgNP suspension in ultrapure water. (B) 20 nm citrate-stabilized AgNP concentrations versus the intensity of the  $\lambda_{max}$  absorbance.

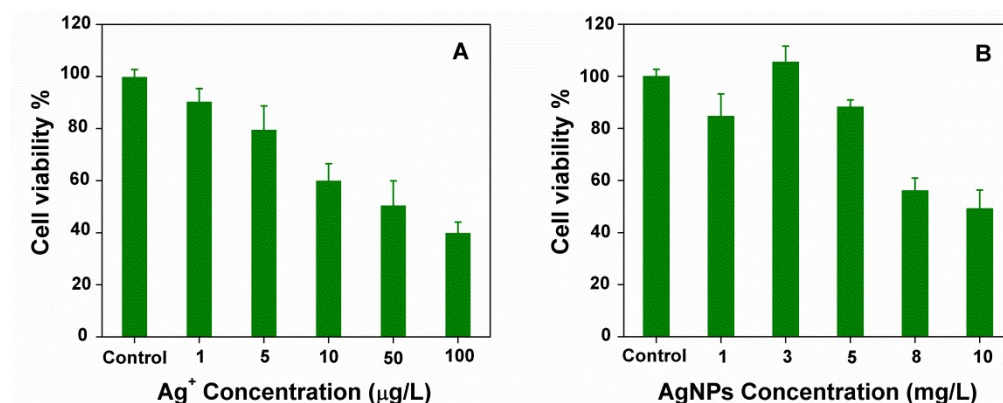

Figure S4. Concentration-dependent effects on cell viability in *P. chrysosporium*. The cells were exposed to (A) dissolved  $Ag^+$  (as  $AgNO_3$ ), or (B) citrate-stabilized AgNPs. Error bars are sample standard deviations from triplicate measurements. Exposure time = 12 h.

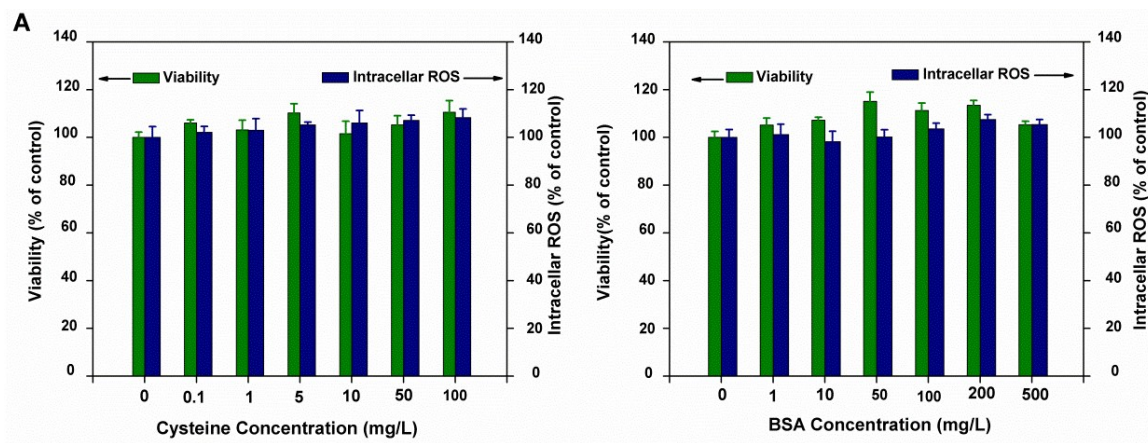

Figure S5. Concentration-dependent effects on cell viability and intracellular ROS level in *P. chrysosporium*. The cells were exposed to (A) CYS, (B) BSA

**Table S1.**FWHM (nm) of AgNPs in the presence of CYS

| CYS concentration | 0 h      | 3 h      | 6 h       | 9 h       | 12 h      |
|-------------------|----------|----------|-----------|-----------|-----------|
| 0.1 mg/L          | 72 ± 2.3 | 78 ± 0   | 82 ± 2.3  | 84 ± 0.6  | 84 ± 1.1  |
| 10 mg/L           | 82 ± 1.1 | 90 ± 0.9 | 94 ± 0.80 | 96 ± 0.9  | 102 ± 1.7 |
| 50 mg/L           | 82 ± 2.5 | 88 ± 1.3 | 96 ± 1.1  | 100 ± 1.0 | 106 ± 1.5 |
| 100 mg/L          | 86 ± 1.9 | 90 ± 0.8 | 100 ± 0.7 | 102 ± 0.9 | 102 ± 1.0 |

**Table S2.**FWHM (nm) of AgNPs in the presence of BSA

| BSA concentration | 0 h      | 3 h      | 6 h      | 9 h      | 12 h     |
|-------------------|----------|----------|----------|----------|----------|
| 1 mg/L            | 62 ± 0   | 64 ± 1.5 | 66 ± 0.7 | 66 ± 1.0 | 68 ± 0.9 |
| 10 mg/L           | 62 ± 0.9 | 66 ± 0   | 66 ± 0.7 | 68 ± 1.1 | 68 ± 0.7 |
| 100 mg/L          | 64 ± 1.0 | 66 ± 0   | 66 ± 0.9 | 70 ± 0.6 | 72 ± 1.2 |
| 500 mg/L          | 66 ± 1.7 | 68 ± 0.9 | 70 ± 1.2 | 70 ± 2.5 | 72 ± 1.7 |
